## CORRECTION

# Correction: Development and validation of the Continuous Traumatic Stress Response scale (CTSR) among adults exposed to ongoing security threats

The *PLOS ONE* Staff

## Notice of republication

An incorrect version of Fig 1 was published in the original version of this article. The publisher apologizes for the error. This article was republished on June 7, 2021 to correct for this error. Please download this article again to view the correct version.

## Reference

1. Goral A, Feder-Bubis P, Lahad M, Galea S, O'Rourke N, Aharonson-Daniel L (2021) Development and validation of the Continuous Traumatic Stress Response scale (CTSR) among adults exposed to ongoing security threats. *PLoS ONE* 16(5): e0251724. <https://doi.org/10.1371/journal.pone.0251724> PMID: 34043646

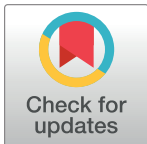

## OPEN ACCESS

**Citation:** The *PLOS ONE* Staff (2021) Correction: Development and validation of the Continuous Traumatic Stress Response scale (CTSR) among adults exposed to ongoing security threats. *PLoS ONE* 16(6): e0253529. <https://doi.org/10.1371/journal.pone.0253529>

**Published:** June 15, 2021

**Copyright:** © 2021 The PLOS ONE Staff. This is an open access article distributed under the terms of the [Creative Commons Attribution License](https://creativecommons.org/licenses/by/4.0/), which permits unrestricted use, distribution, and reproduction in any medium, provided the original author and source are credited.
